# Supplementary material
Source: PubMed Central journal article supplement (PMC2938129)
Supplement: blood-2010-03-275859_1.pdf [file blood-2010-03-275859_1.pdf]

**Table S1. Semi-nested PCR Primers**

| PCR1 Primer name | Primer Sequence                    |
|------------------|------------------------------------|
| IGHV1            | CCTCAGTGAAGGTCTCCTGCAAGG           |
| IGHV2            | TCCTGCGCTGGTAAAACCCACACA           |
| IGHV3            | GGTCCCTGAGACTCTCCTGTGCA            |
| IGHV4            | TCGGAGACCCTGTCCCTCACCTGC           |
| IGHV5            | CAGTCTGGAGCAGAGGTGAAA              |
| IGHV6            | CCTGTGCCATCTCCGGGGACAGTG           |
| CHA''            | GGCTCCTGGGGGAAGAAGCC               |
| CHG''            | GAGTTCACGACACCGTCAC                |
| CHM''            | GGGGAATTCTCACAGGAGAC               |
| IGHJ             | ACCTGAGGAGACGGTGACCAGGGT           |
| PCR2 Primer name | Primer Sequence <sup>†</sup>       |
| MID1: IGHV1      | acgagtgcgtCCTCAGTGAAGGTCTCCTGCAAGG |
| MID1: IGHV2      | acgagtgcgtTCCTGCGCTGGTAAAACCCACACA |
| MID1: IGHV3      | acgagtgcgtGGTCCCTGAGACTCTCCTGTGCA  |
| MID1: IGHV4      | acgagtgcgtTCGGAGACCCTGTCCCTCACCTGC |
| MID1: IGHV5      | acgagtgcgtCAGTCTGGAGCAGAGGTGAAA    |
| MID1: IGHV6      | acgagtgcgtCCTGTGCCATCTCCGGGGACAGTG |
| MID1: CHA        | acgagtgcgtGGAAGAAGCCCTGGACCAGGC    |
| MID1: CHG        | acgagtgcgtCACCGTCACCGGTTTCGGGG     |
| MID1: CHM        | acgagtgcgtCAGGAGACGAGGGGGAAAAGG    |
| MID2: IGHV1      | acgctcgacaCCTCAGTGAAGGTCTCCTGCAAGG |
| MID2: IGHV2      | acgctcgacaTCCTGCGCTGGTAAAACCCACACA |
| MID2: IGHV3      | acgctcgacaGGTCCCTGAGACTCTCCTGTGCA  |
| MID2: IGHV4      | acgctcgacaTCGGAGACCCTGTCCCTCACCTGC |
| MID2: IGHV5      | acgctcgacaCAGTCTGGAGCAGAGGTGAAA    |
| MID2: IGHV6      | acgctcgacaCCTGTGCCATCTCCGGGGACAGTG |
| MID2: CHA        | acgctcgacaGGAAGAAGCCCTGGACCAGGC    |
| MID2: CHG        | acgctcgacaCACCGTCACCGGTTTCGGGG     |
| MID2: CHM        | acgctcgacaCAGGAGACGAGGGGGAAAAGG    |
| MID3: IGHV1      | agacgcactcCCTCAGTGAAGGTCTCCTGCAAGG |
| MID3: IGHV2      | agacgcactcTCCTGCGCTGGTAAAACCCACACA |
| MID3: IGHV3      | agacgcactcGGTCCCTGAGACTCTCCTGTGCA  |
| MID3: IGHV4      | agacgcactcTCGGAGACCCTGTCCCTCACCTGC |
| MID3: IGHV5      | agacgcactcCAGTCTGGAGCAGAGGTGAAA    |
| MID3: IGHV6      | agacgcactcCCTGTGCCATCTCCGGGGACAGTG |
| MID3: CHA        | agacgcactcGGAAGAAGCCCTGGACCAGGC    |
| MID3: CHG        | agacgcactcCACCGTCACCGGTTTCGGGG     |
| MID3: CHM        | agacgcactcCAGGAGACGAGGGGGAAAAGG    |
| MID4: IGHV1      | agcactgtagCCTCAGTGAAGGTCTCCTGCAAGG |
| MID4: IGHV2      | agcactgtagTCCTGCGCTGGTAAAACCCACACA |
| MID4: IGHV3      | agcactgtagGGTCCCTGAGACTCTCCTGTGCA  |
| MID4: IGHV4      | agcactgtagTCGGAGACCCTGTCCCTCACCTGC |
| MID4: IGHV5      | agcactgtagCAGTCTGGAGCAGAGGTGAAA    |
| MID4: IGHV6      | agcactgtagCCTGTGCCATCTCCGGGGACAGTG |
| MID4: VLJH       | agcactgtagGTGACCAGGGTACCTTGGCCCCAG |
| MID4: CHA        | agcactgtagGGAAGAAGCCCTGGACCAGGC    |
| MID4: CHG        | agcactgtagCACCGTCACCGGTTTCGGGG     |

---

|              |                                     |
|--------------|-------------------------------------|
| MID4: CHM    | agcactgtagCAGGAGACGAGGGGGAAAAGG     |
| MID5: IGHV1  | atcagacacgCCTCAGTGAAGGTCTCCTGCAAGG  |
| MID5: IGHV2  | atcagacacgTCCTGCGCTGGTAAAACCCACACA  |
| MID5: IGHV3  | atcagacacgGGTCCCTGAGACTCTCCTGTGCA   |
| MID5: IGHV4  | atcagacacgTCGGAGACCCTGTCCCTCACCTGC  |
| MID5: IGHV5  | atcagacacgCAGTCTGGAGCAGAGGTGAAA     |
| MID5: IGHV6  | atcagacacgCCTGTGCCATCTCCGGGGACAGTG  |
| MID5: CHA    | atcagacacgGGAAGAAGCCCTGGACCAGGC     |
| MID5: CHG    | atcagacacgCACCGTCACCGGTTCCGGG       |
| MID5: CHM    | atcagacacgCAGGAGACGAGGGGGAAAAGG     |
| MID6: IGHV1  | atatcgcgagCCTCAGTGAAGGTCTCCTGCAAGG  |
| MID6: IGHV2  | atatcgcgagTCCTGCGCTGGTAAAACCCACACA  |
| MID6: IGHV3  | atatcgcgagGGTCCCTGAGACTCTCCTGTGCA   |
| MID6: IGHV4  | atatcgcgagTCGGAGACCCTGTCCCTCACCTGC  |
| MID6: IGHV5  | atatcgcgagCAGTCTGGAGCAGAGGTGAAA     |
| MID6: IGHV6  | atatcgcgagCCTGTGCCATCTCCGGGGACAGTG  |
| MID6: CHA    | atatcgcgagGGAAGAAGCCCTGGACCAGGC     |
| MID6: CHG    | atatcgcgagCACCGTCACCGGTTCCGGG       |
| MID6: CHM    | atatcgcgagCAGGAGACGAGGGGGAAAAGG     |
| MID7: IGHV   | cgtgtctctaCCTCAGTGAAGGTCTCCTGCAAGG  |
| MID7: IGHV1  | cgtgtctctaTCCTGCGCTGGTAAAACCCACACA  |
| MID7: IGHV2  | cgtgtctctaGGTCCCTGAGACTCTCCTGTGCA   |
| MID7: IGHV3  | cgtgtctctaTCGGAGACCCTGTCCCTCACCTGC  |
| MID7: IGHV4  | cgtgtctctaCAGTCTGGAGCAGAGGTGAAA     |
| MID7: IGHV5  | cgtgtctctaCCTGTGCCATCTCCGGGGACAGTG  |
| MID7: CHA    | cgtgtctctaGGAAGAAGCCCTGGACCAGGC     |
| MID7: CHG    | cgtgtctctaCACCGTCACCGGTTCCGGG       |
| MID7: CHM    | cgtgtctctaCAGGAGACGAGGGGGAAAAGG     |
| MID8: IGHV1  | ctcgcgtgtcCCTCAGTGAAGGTCTCCTGCAAGG  |
| MID8: IGHV2  | ctcgcgtgtcTCCTGCGCTGGTAAAACCCACACA  |
| MID8: IGHV3  | ctcgcgtgtcGGTCCCTGAGACTCTCCTGTGCA   |
| MID8: IGHV4  | ctcgcgtgtcTCGGAGACCCTGTCCCTCACCTGC  |
| MID8: IGHV5  | ctcgcgtgtcCAGTCTGGAGCAGAGGTGAAA     |
| MID8: IGHV6  | ctcgcgtgtcCCTGTGCCATCTCCGGGGACAGTG  |
| MID8: CHA    | ctcgcgtgtcGGAAGAAGCCCTGGACCAGGC     |
| MID8: CHG    | ctcgcgtgtcCACCGTCACCGGTTCCGGG       |
| MID8: CHM    | ctcgcgtgtcCAGGAGACGAGGGGGAAAAGG     |
| MID9: IGHV1  | tagtatacagcCCTCAGTGAAGGTCTCCTGCAAGG |
| MID9: IGHV2  | tagtatacagcTCCTGCGCTGGTAAAACCCACACA |
| MID9: IGHV3  | tagtatacagcGGTCCCTGAGACTCTCCTGTGCA  |
| MID9: IGHV4  | tagtatacagcTCGGAGACCCTGTCCCTCACCTGC |
| MID9: IGHV5  | tagtatacagcCAGTCTGGAGCAGAGGTGAAA    |
| MID9: IGHV6  | tagtatacagcCCTGTGCCATCTCCGGGGACAGTG |
| MID9: CHA    | tagtatacagcGGAAGAAGCCCTGGACCAGGC    |
| MID9: CHG    | tagtatacagcCACCGTCACCGGTTCCGGG      |
| MID9: CHM    | tagtatacagcCAGGAGACGAGGGGGAAAAGG    |
| MID10: IGHV1 | tctctatgcgCCTCAGTGAAGGTCTCCTGCAAGG  |
| MID10: IGHV2 | tctctatgcgTCCTGCGCTGGTAAAACCCACACA  |
| MID10: IGHV3 | tctctatgcgGGTCCCTGAGACTCTCCTGTGCA   |

---

---

|              |                                    |
|--------------|------------------------------------|
| MID10: IGHV4 | tctctatgcgTCGGAGACCCTGTCCCTCACCTGC |
| MID10: IGHV5 | tctctatgcgCAGTCTGGAGCAGAGGTGAAA    |
| MID10: IGHV6 | tctctatgcgCCTGTGCCATCTCCGGGGACAGTG |
| MID10: CHA   | tctctatgcgGGAAGAAGCCCTGGACCAGGC    |
| MID10: CHG   | tctctatgcgCACCGTCACCGGTTCTGGGG     |
| MID10: CHM   | tctctatgcgCAGGAGACGAGGGGGAAAAGG    |
| MID11: IGHV1 | tgatacgtctCCTCAGTGAAGGTCTCCTGCAAGG |
| MID11: IGHV2 | tgatacgtctTCCTGCGCTGGTAAAACCCACACA |
| MID11: IGHV3 | tgatacgtctGGTCCCTGAGACTCTCCTGTGCA  |
| MID11: IGHV4 | tgatacgtctTCGGAGACCCTGTCCCTCACCTGC |
| MID11: IGHV6 | tgatacgtctCAGTCTGGAGCAGAGGTGAAA    |
| MID11: IGHV6 | tgatacgtctCCTGTGCCATCTCCGGGGACAGTG |
| MID11: CHA   | tgatacgtctGGAAGAAGCCCTGGACCAGGC    |
| MID11: CHG   | tgatacgtctCACCGTCACCGGTTCTGGGG     |
| MID11: CHM   | tgatacgtctCAGGAGACGAGGGGGAAAAGG    |
| MID12: IGHV1 | tactgagctaCCTCAGTGAAGGTCTCCTGCAAGG |
| MID12: IGHV2 | tactgagctaTCCTGCGCTGGTAAAACCCACACA |
| MID12: IGHV3 | tactgagctaAGTCCCTGAGACTCTCCTGTGCA  |
| MID12: IGHV4 | tactgagctaTCGGAGACCCTGTCCCTCACCTGC |
| MID12: IGHV5 | tactgagctaCAGTCTGGAGCAGAGGTGAAA    |
| MID12: IGHV6 | tactgagctaCCTGTGCCATCTCCGGGGACAGTG |
| MID12: CHA   | tactgagctaGGAAGAAGCCCTGGACCAGGC    |
| MID12: CHG   | tactgagctaCACCGTCACCGGTTCTGGGG     |
| MID12: CHM   | tactgagctaCAGGAGACGAGGGGGAAAAGG    |

---

**Table S1. Semi-nested PCR Primers**

† Capital letters correspond to gene-specific sequences, and small letters to the 10-base pair MID sequence.

All sequences are written 5' to 3'.

| Volunteer    |              | a  |       |    |       |    |            |     |              | b  |       |   |       |    |            |    |              | c  |       |   |      |    |            |    |     |    |  |  |     |  |  |  |    |  |  |  |    |  |  |  |     |  |  |  |     |
|--------------|--------------|----|-------|----|-------|----|------------|-----|--------------|----|-------|---|-------|----|------------|----|--------------|----|-------|---|------|----|------------|----|-----|----|--|--|-----|--|--|--|----|--|--|--|----|--|--|--|-----|--|--|--|-----|
| Population   | Transitional |    | Naïve |    | IgM   |    | IgG or IgA |     | Transitional |    | Naïve |   | IgM   |    | IgG or IgA |    | Transitional |    | Naïve |   | IgM  |    | IgG or IgA |    |     |    |  |  |     |  |  |  |    |  |  |  |    |  |  |  |     |  |  |  |     |
| Cell count   | 1700         |    | 39200 |    | 10400 |    | 20300      |     | 3700         |    | 35300 |   | 23600 |    | 6200       |    | 200          |    | 20300 |   | 2900 |    | 11000      |    |     |    |  |  |     |  |  |  |    |  |  |  |    |  |  |  |     |  |  |  |     |
| QC pass      | 16%          |    | 89%   |    | 93%   |    | 93%        |     | 70%          |    | 45%   |   | 32%   |    | 89%        |    | 80%          |    | 65%   |   | 95%  |    | 87%        |    |     |    |  |  |     |  |  |  |    |  |  |  |    |  |  |  |     |  |  |  |     |
| Sequence     | 121          |    | 669   |    | 395   |    | 1296       |     | 335          |    | 68    |   | 228   |    | 579        |    | 84           |    | 56    |   | 1088 |    | 265        |    |     |    |  |  |     |  |  |  |    |  |  |  |    |  |  |  |     |  |  |  |     |
| Clone count  | 95           |    | 561   |    | 289   |    | 734        |     | 285          |    | 55    |   | 177   |    | 309        |    | 53           |    | 46    |   | 743  |    | 250        |    |     |    |  |  |     |  |  |  |    |  |  |  |    |  |  |  |     |  |  |  |     |
| Variability* | nv           | v  | nv    | v  | nv    | v  | nv         | v   | nv           | v  | nv    | v | nv    | v  | nv         | v  | nv           | v  | nv    | v | nv   | v  | nv         | v  |     |    |  |  |     |  |  |  |    |  |  |  |    |  |  |  |     |  |  |  |     |
| Clone Size   | 1            | 76 |       |    | 477   |    |            |     | 232          |    |       |   | 534   |    |            |    | 251          |    |       |   | 46   |    |            |    | 143 |    |  |  | 210 |  |  |  | 33 |  |  |  | 37 |  |  |  | 583 |  |  |  | 205 |
|              | 2            | 9  | 5     |    | 46    | 25 | 29         | 6   | 59           | 49 | 18    | 6 | 5     | 1  | 19         | 6  | 29           | 22 | 9     | 3 | 6    | 2  | 69         | 42 | 13  | 10 |  |  |     |  |  |  |    |  |  |  |    |  |  |  |     |  |  |  |     |
|              | 3            |    | 3     |    | 4     | 3  | 3          | 8   | 16           | 22 | 4     | 2 | 1     | 1  | 3          | 2  | 3            | 16 | 2     | 3 | 1    | 10 | 16         | 1  | 6   |    |  |  |     |  |  |  |    |  |  |  |    |  |  |  |     |  |  |  |     |
|              | 4            |    |       |    | 1     | 2  | 1          | 2   | 5            | 11 | 2     | 1 | 1     |    | 1          | 3  | 8            |    | 1     | 2 |      | 4  | 7          |    | 5   |    |  |  |     |  |  |  |    |  |  |  |    |  |  |  |     |  |  |  |     |
|              | 5            | 1  |       |    | 3     | 3  | 1          | 3   | 2            | 10 |       |   |       |    | 2          |    | 6            |    |       |   |      | 1  | 1          |    | 1   |    |  |  |     |  |  |  |    |  |  |  |    |  |  |  |     |  |  |  |     |
|              | 6            | 1  |       |    |       |    | 1          | 1   | 1            | 2  | 1     |   |       |    | 1          |    | 1            |    |       |   |      | 1  | 3          |    | 3   |    |  |  |     |  |  |  |    |  |  |  |    |  |  |  |     |  |  |  |     |
|              | 7            | 1  |       |    |       |    |            | 1   | 1            | 2  |       |   |       |    |            |    | 4            |    |       |   |      |    |            |    | 1   |    |  |  |     |  |  |  |    |  |  |  |    |  |  |  |     |  |  |  |     |
|              | 8            |    |       |    |       |    |            | 0   |              | 5  |       |   |       |    |            |    |              |    |       |   |      |    |            |    | 1   | 2  |  |  |     |  |  |  |    |  |  |  |    |  |  |  |     |  |  |  |     |
|              | 9            |    |       |    |       |    |            | 1   |              | 3  |       |   |       |    |            |    | 1            |    |       |   |      |    |            |    |     | 1  |  |  |     |  |  |  |    |  |  |  |    |  |  |  |     |  |  |  |     |
|              | 10           |    |       |    |       |    |            |     | 1            | 3  |       |   |       |    |            |    | 1            |    |       |   |      |    |            |    |     |    |  |  |     |  |  |  |    |  |  |  |    |  |  |  |     |  |  |  |     |
|              | 11           |    |       |    |       |    |            |     |              | 1  |       |   |       |    |            |    | 1            |    |       |   |      |    |            |    |     |    |  |  |     |  |  |  |    |  |  |  |    |  |  |  |     |  |  |  |     |
|              | 12           |    |       |    |       |    |            |     |              | 1  |       |   |       |    |            |    |              |    |       |   |      |    |            |    |     |    |  |  |     |  |  |  |    |  |  |  |    |  |  |  |     |  |  |  |     |
|              | 13           |    |       |    |       |    |            |     |              | 1  |       |   |       |    |            |    | 1            |    |       |   |      |    |            |    |     |    |  |  |     |  |  |  |    |  |  |  |    |  |  |  |     |  |  |  |     |
|              | 15           |    |       |    |       |    |            |     |              | 1  |       |   |       |    |            |    | 1            |    |       |   |      |    |            |    |     |    |  |  |     |  |  |  |    |  |  |  |    |  |  |  |     |  |  |  |     |
|              | 17           |    |       |    |       |    |            |     |              | 1  |       |   |       |    |            |    |              |    |       |   |      |    |            |    |     |    |  |  |     |  |  |  |    |  |  |  |    |  |  |  |     |  |  |  |     |
|              | 20           |    |       |    |       |    |            |     |              |    |       |   |       |    |            |    |              |    |       |   |      |    |            |    |     |    |  |  |     |  |  |  |    |  |  |  |    |  |  |  |     |  |  |  |     |
|              | 21           |    |       |    |       |    |            |     |              |    |       |   |       |    |            |    | 1            |    |       |   |      |    |            |    |     |    |  |  |     |  |  |  |    |  |  |  |    |  |  |  |     |  |  |  |     |
|              | 23           |    |       |    |       |    |            |     |              |    |       |   |       |    |            |    | 1            |    |       |   |      |    |            |    |     |    |  |  |     |  |  |  |    |  |  |  |    |  |  |  |     |  |  |  |     |
|              | 26           |    |       |    |       |    |            |     |              |    |       |   |       |    |            |    |              |    |       |   |      |    |            |    |     |    |  |  |     |  |  |  |    |  |  |  |    |  |  |  |     |  |  |  |     |
|              | 27           |    |       |    |       |    |            |     |              | 1  |       |   |       |    |            |    |              |    |       |   |      |    |            |    |     |    |  |  |     |  |  |  |    |  |  |  |    |  |  |  |     |  |  |  |     |
|              | 28           |    |       |    |       |    |            |     |              | 2  |       |   |       |    |            |    |              |    |       |   |      |    |            |    |     |    |  |  |     |  |  |  |    |  |  |  |    |  |  |  |     |  |  |  |     |
|              | 29           |    |       |    |       |    |            |     |              | 1  |       |   |       |    |            |    |              |    |       |   |      |    |            |    |     |    |  |  |     |  |  |  |    |  |  |  |    |  |  |  |     |  |  |  |     |
|              | 37           |    |       |    |       |    |            |     |              |    |       |   |       |    |            |    |              |    |       |   |      |    |            |    |     |    |  |  |     |  |  |  |    |  |  |  |    |  |  |  |     |  |  |  |     |
|              | 74           |    |       |    |       |    |            |     |              |    |       |   |       |    |            |    |              |    |       |   |      |    |            |    |     |    |  |  |     |  |  |  |    |  |  |  |    |  |  |  |     |  |  |  |     |
| Total Clone  | 87           | 8  | 530   | 31 | 267   | 22 | 619        | 115 | 276          | 9  | 53    | 2 | 165   | 12 | 245        | 64 | 45           | 8  | 44    | 2 | 670  | 73 | 220        | 30 |     |    |  |  |     |  |  |  |    |  |  |  |    |  |  |  |     |  |  |  |     |

**Table S2. Origins of data and clonal variability**

\* nv: non-variable, where the % IGHV gene similarity to the germline IGHV sequence varies by less than 1 within a clonal group. v: variable where the % IGHV gene similarity to the germline IGHV sequence varies by more than 1 within a clonal group. Variability indicates that a clone expanded *in vivo* during an immune response involving somatic hypermutation. Non-variable clones may have been generated by PCR, or by sequencing of more than one copy of cDNA from one cell, rather than reflecting the *in vivo* situation, especially if the number of cells in the initial samples were low. However, non-variable clones may exist *in vivo*, as evidenced in our data by a number of instances where members of a non-variable clone have been isolated from different samples

(data not shown). Additionally, in all cases the majority of sequences are unique (clone size = 1), so the initial sample population does not appear to be limiting. Since there is no absolute test to distinguish between *in vivo* cell clonal groups and “clones” due to multiple cDNA copies or PCR amplification then the data for memory populations should be considered in comparison to that for the transitional and naïve groups where significant *in vivo* clonal expansion would not be expected.

| Volunteer  | a       |         |         |         |         |         | b       |         |         |         |         |         | c       |         |         |         |         |         |
|------------|---------|---------|---------|---------|---------|---------|---------|---------|---------|---------|---------|---------|---------|---------|---------|---------|---------|---------|
|            | T vs. N | T vs. S | T vs. M | N vs. S | N vs. M | S vs. M | T vs. N | T vs. S | T vs. M | N vs. S | N vs. M | S vs. M | T vs. N | T vs. S | T vs. M | N vs. S | N vs. M | S vs. M |
| IGHV1-18   | *       | **      |         | *       | ***     | ***     | *       |         |         |         |         |         |         |         |         | *       |         | ***     |
| IGHV1-2    |         | *       |         | **      | **      | ***     | **      |         |         |         | *       |         |         | ***     | ***     |         |         |         |
| IGHV1-24   |         |         |         |         |         |         |         |         |         |         |         |         |         |         |         |         |         |         |
| IGHV1-3    | *       |         | *       | ***     |         | **      |         |         |         |         |         |         |         |         |         |         |         | **      |
| IGHV1-46   |         | *       |         | ***     | ***     | ***     |         | *       |         |         | *       |         |         |         |         |         |         | ***     |
| IGHV1-58   | *       |         |         | *       |         |         |         |         |         |         |         |         |         |         |         |         |         |         |
| IGHV1-69   |         |         | ***     |         | ***     | ***     | **      |         | *       |         | ***     |         |         | ***     |         |         |         | ***     |
| IGHV1-8    |         |         |         |         |         |         |         |         |         |         |         |         |         |         |         |         |         | *       |
| IGHV2-26   |         |         |         |         |         |         |         |         |         |         |         |         |         | *       |         |         |         |         |
| IGHV2-5    |         |         |         | *       |         |         |         |         |         |         |         |         | ***     |         |         |         |         | ***     |
| IGHV2-70   |         |         | *       |         | *       |         | *       |         |         |         |         |         | *       |         |         |         |         | *       |
| IGHV3-11   | *       |         |         |         |         |         |         |         |         | *       |         |         |         |         |         |         |         |         |
| IGHV3-13   |         |         |         |         |         |         | *       |         |         |         |         |         |         |         | ***     | ***     |         |         |
| IGHV3-15   |         | **      |         |         | *       | *       |         |         |         |         |         |         |         |         |         |         |         |         |
| IGHV3-20   | *       |         |         |         |         |         |         |         |         |         |         |         |         |         |         |         |         |         |
| IGHV3-21   |         |         |         | *       |         |         |         |         |         |         |         |         |         |         |         |         |         |         |
| IGHV3-22   |         |         |         |         |         |         |         |         |         |         |         |         |         |         |         |         |         |         |
| IGHV3-23   | *       |         | ***     | *       | **      | ***     |         |         |         |         |         |         |         | *       |         |         |         | **      |
| IGHV3-30   |         | ***     |         | **      |         | *       | *       | *       | *       | *       | *       |         |         |         |         |         |         |         |
| IGHV3-30-3 | *       |         |         | ***     | ***     | *       |         |         |         |         |         |         | **      |         | **      | *       |         |         |
| IGHV3-33   | *       |         |         | ***     | **      |         | *       | *       |         |         |         |         |         |         |         |         |         |         |
| IGHV3-43   | **      |         |         |         |         |         |         |         |         |         |         |         |         |         |         |         |         |         |
| IGHV3-48   | *       |         |         |         | ***     | ***     |         | **      |         |         | **      |         |         |         |         |         |         |         |
| IGHV3-49   |         |         |         |         |         |         |         |         |         |         |         |         |         |         |         | *       |         |         |
| IGHV3-53   |         |         |         |         |         | *       | **      |         |         |         |         |         | *       |         |         |         |         |         |
| IGHV3-64   | *       | *       |         |         | *       | *       |         |         |         |         |         |         |         |         |         | *       |         |         |
| IGHV3-66   |         |         |         |         | **      | **      |         |         |         |         |         |         |         |         |         |         |         | *       |
| IGHV3-7    |         |         |         |         | *       | **      |         |         |         |         |         |         |         |         |         |         |         |         |
| IGHV3-71   |         |         |         |         |         |         |         |         |         |         |         |         |         |         |         |         |         |         |
| IGHV3-72   | *       |         |         | *       |         |         |         |         |         |         |         |         |         |         |         |         |         |         |
| IGHV3-73   |         |         |         |         |         |         |         |         |         |         |         |         | *       |         |         |         |         |         |
| IGHV3-74   |         |         | *       |         | **      | **      |         |         |         |         |         |         |         |         |         |         |         |         |
| IGHV3-9    | *       | *       |         |         |         |         |         |         |         |         |         |         |         |         | **      | **      |         |         |
| IGHV3-h    |         |         |         |         |         |         |         |         |         |         |         |         |         |         |         |         |         |         |
| IGHV4-28   |         |         |         |         |         |         |         |         |         |         |         |         |         |         |         |         |         |         |
| IGHV4-30-2 | *       |         | **      | *       |         |         |         |         |         |         |         |         |         |         |         |         |         |         |
| IGHV4-30-4 |         |         |         |         |         |         |         |         |         |         |         |         |         |         |         |         |         | *       |
| IGHV4-31   |         |         |         |         |         |         | *       |         | *       |         | **      |         |         |         |         |         |         |         |
| IGHV4-34   |         |         |         |         |         |         | **      | *       | *       | ***     | ***     |         |         |         |         |         |         |         |
| IGHV4-39   |         |         |         |         |         |         |         |         |         |         |         |         |         |         |         |         |         |         |
| IGHV4-4    |         |         |         |         |         |         |         |         |         |         |         |         |         |         |         |         |         | *       |
| IGHV4-55   |         |         |         |         |         |         |         |         |         |         |         |         |         |         |         |         |         |         |
| IGHV4-59   | *       |         |         |         |         |         | *       | *       |         |         |         |         |         |         |         |         |         |         |
| IGHV4-61   |         |         |         |         |         |         | *       | *       | *       |         |         |         |         |         |         | *       | *       | *       |
| IGHV4-b    |         |         |         |         |         |         |         |         |         |         |         |         |         |         |         |         |         |         |
| IGHV5-51   |         |         |         |         |         |         |         |         |         |         |         |         |         |         |         |         |         |         |
| IGHV5-a    |         |         |         |         | *       | *       |         |         |         |         |         |         |         |         | *       |         |         |         |
| IGHV6-1    |         |         |         | *       | **      |         |         |         |         |         |         | *       | ***     | *       |         |         |         | *       |
| IGHV7-4-1  |         |         |         |         |         |         |         |         |         |         |         |         |         |         |         |         |         |         |

**Table S3. Chi-square comparisons of individual IGHV genes between four different populations of B cells in three separate donors<sup>†</sup>**

<sup>†</sup> Transitional, naive, switched memory and IgM memory populations were compared with each other for each individual donor. Total numbers of sequences for each group are as in table S2. p values are indicated as \*p<0.05, \*\*p<0.005 and \*\*\*p<0.0005. p values for the pooled donors are in Table 2.

A

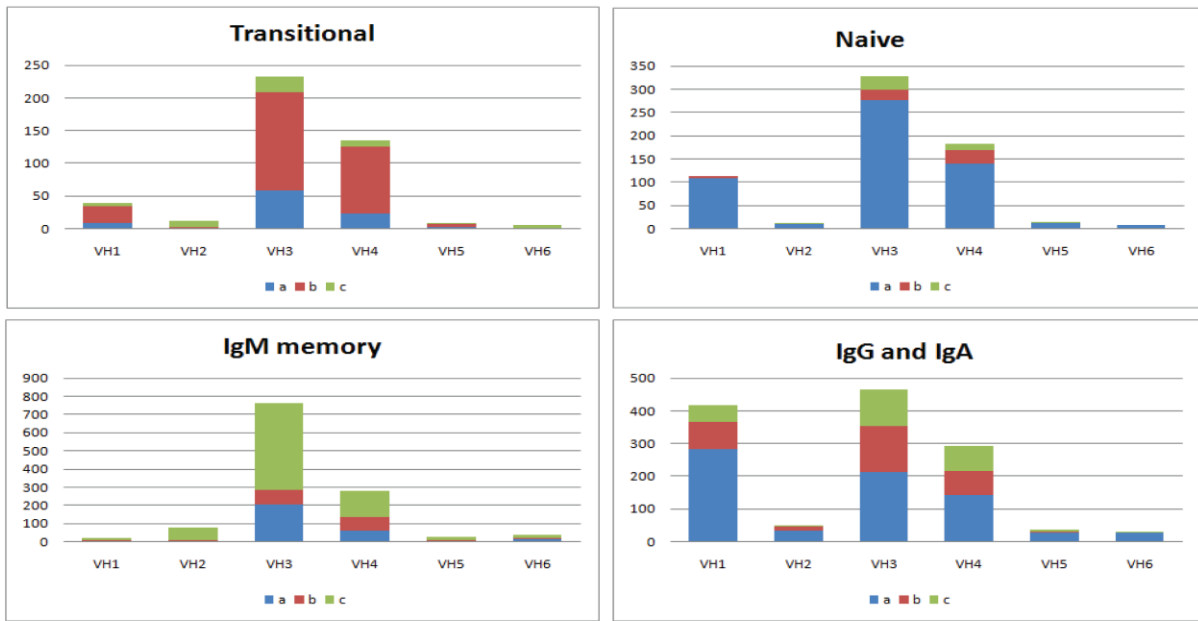

B

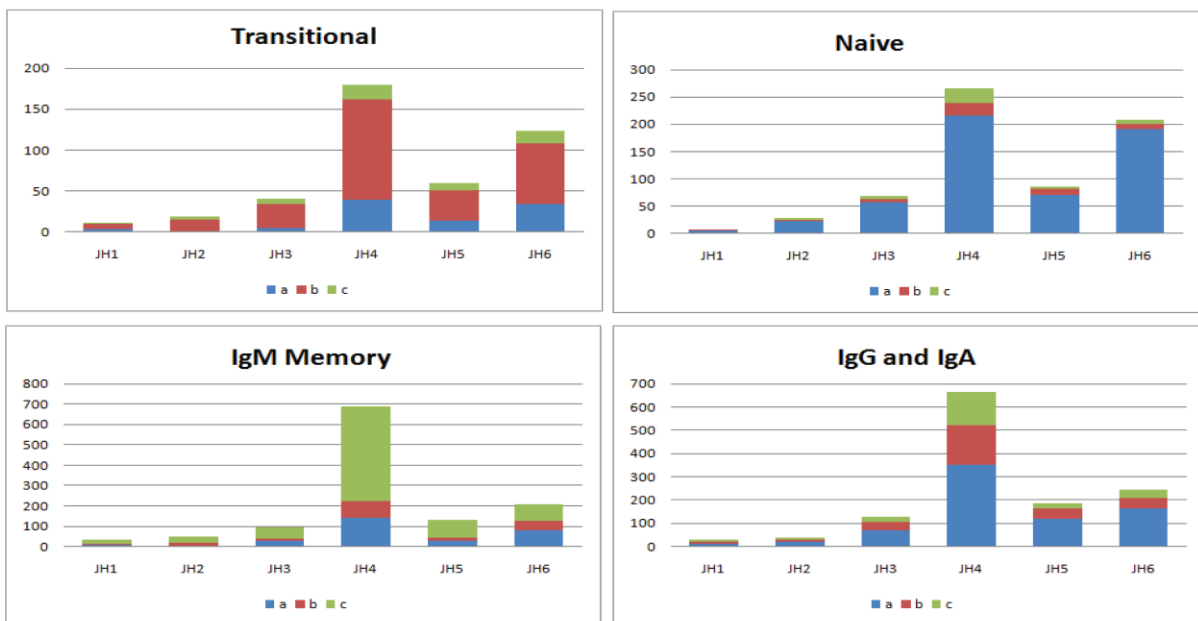

**Figure S1. Individual donor contributions to the repertoire data.** The absolute numbers of sequences in A) IGHV family groups and B) IGHJ family groups in four different B cell populations showing the contribution from donor a (blue) donor b (red) and donor c (green).

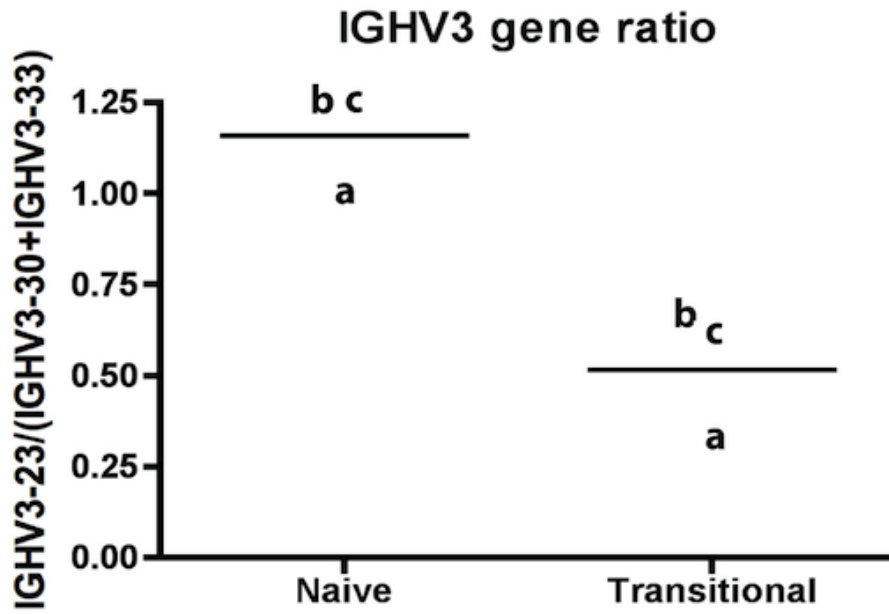

**Figure S2. Individual donor contributions to the IGHV3 gene differences between naïve and transitional cells.** The relative proportions of three common IGHV3 genes changes. The ratio of *IGHV3-23* to (*IGHV3-33* + *IGHV3-30*) is shown for the three donors individually (donors a, b and c as indicated) for naïve and transitional populations.



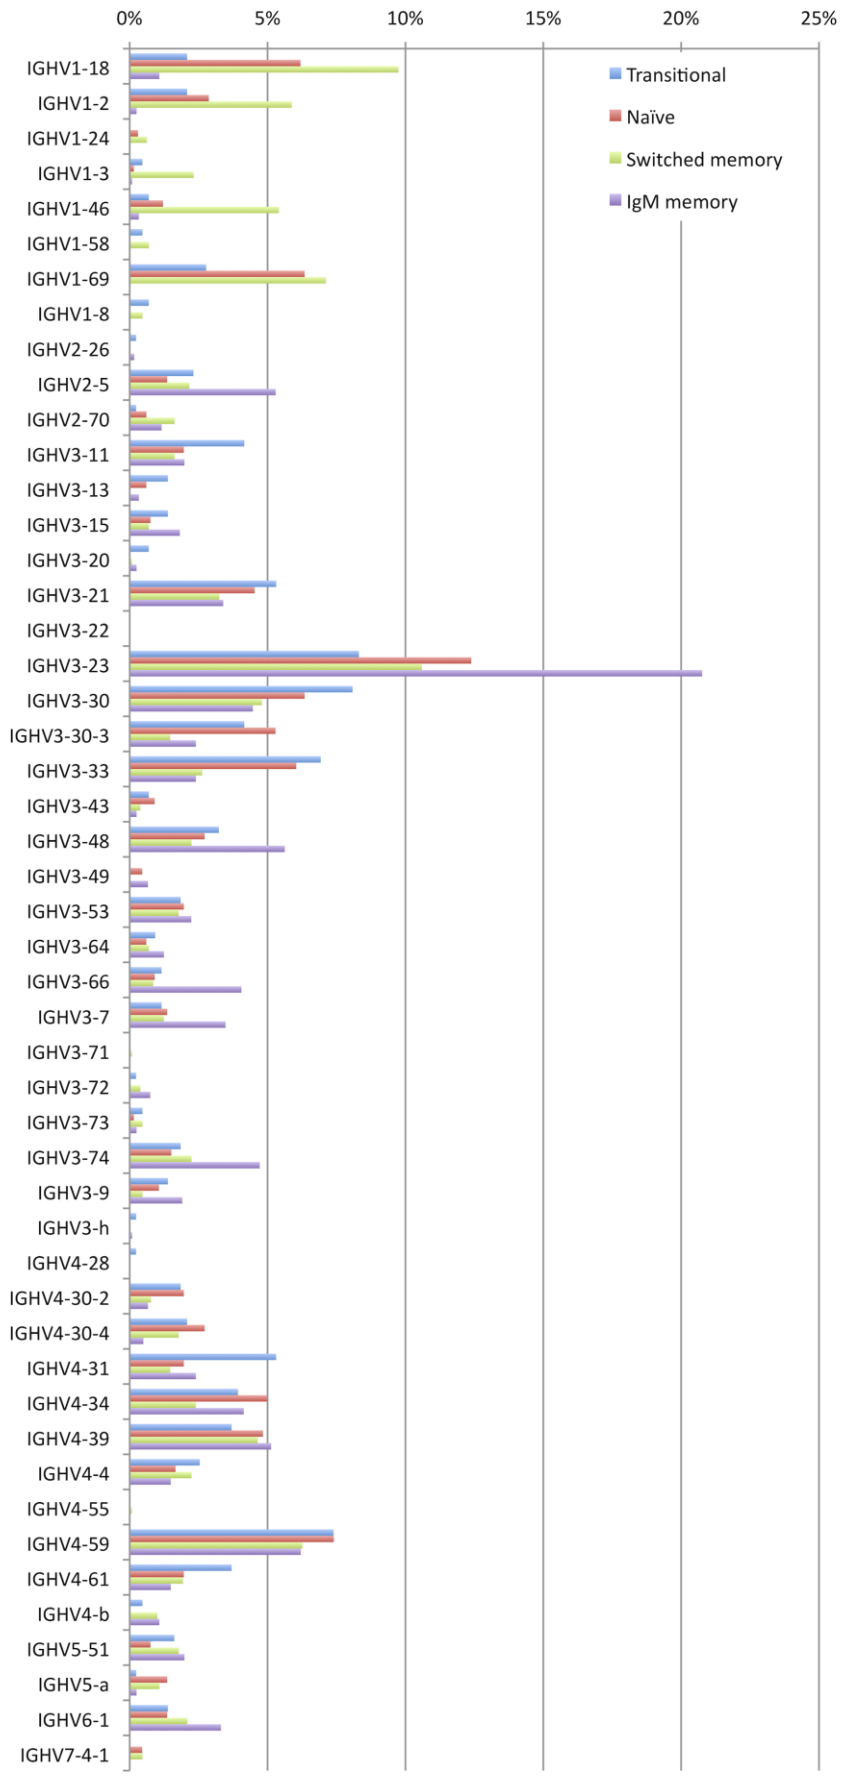

**Figure S3. Individual IGHV gene usage in B cell populations.** The usage frequency of individual IGHV genes in transitional (IgD+CD27-CD10+, n= 433), naïve (IgD+CD27-CD10-, n=662), class-switched memory (IgD- and either IgG+ or IgA+, n=1293) and IgM memory (IgD+CD27+, n=1209) populations. Where clonal expansions of IGHV genes occurred, only one example of each clone family was counted. Allelic variations of each IGHV gene are not shown. Results of Chi-square comparisons are given in Table 2. Usage frequency on an individual donor basis is shown in Figure S4.

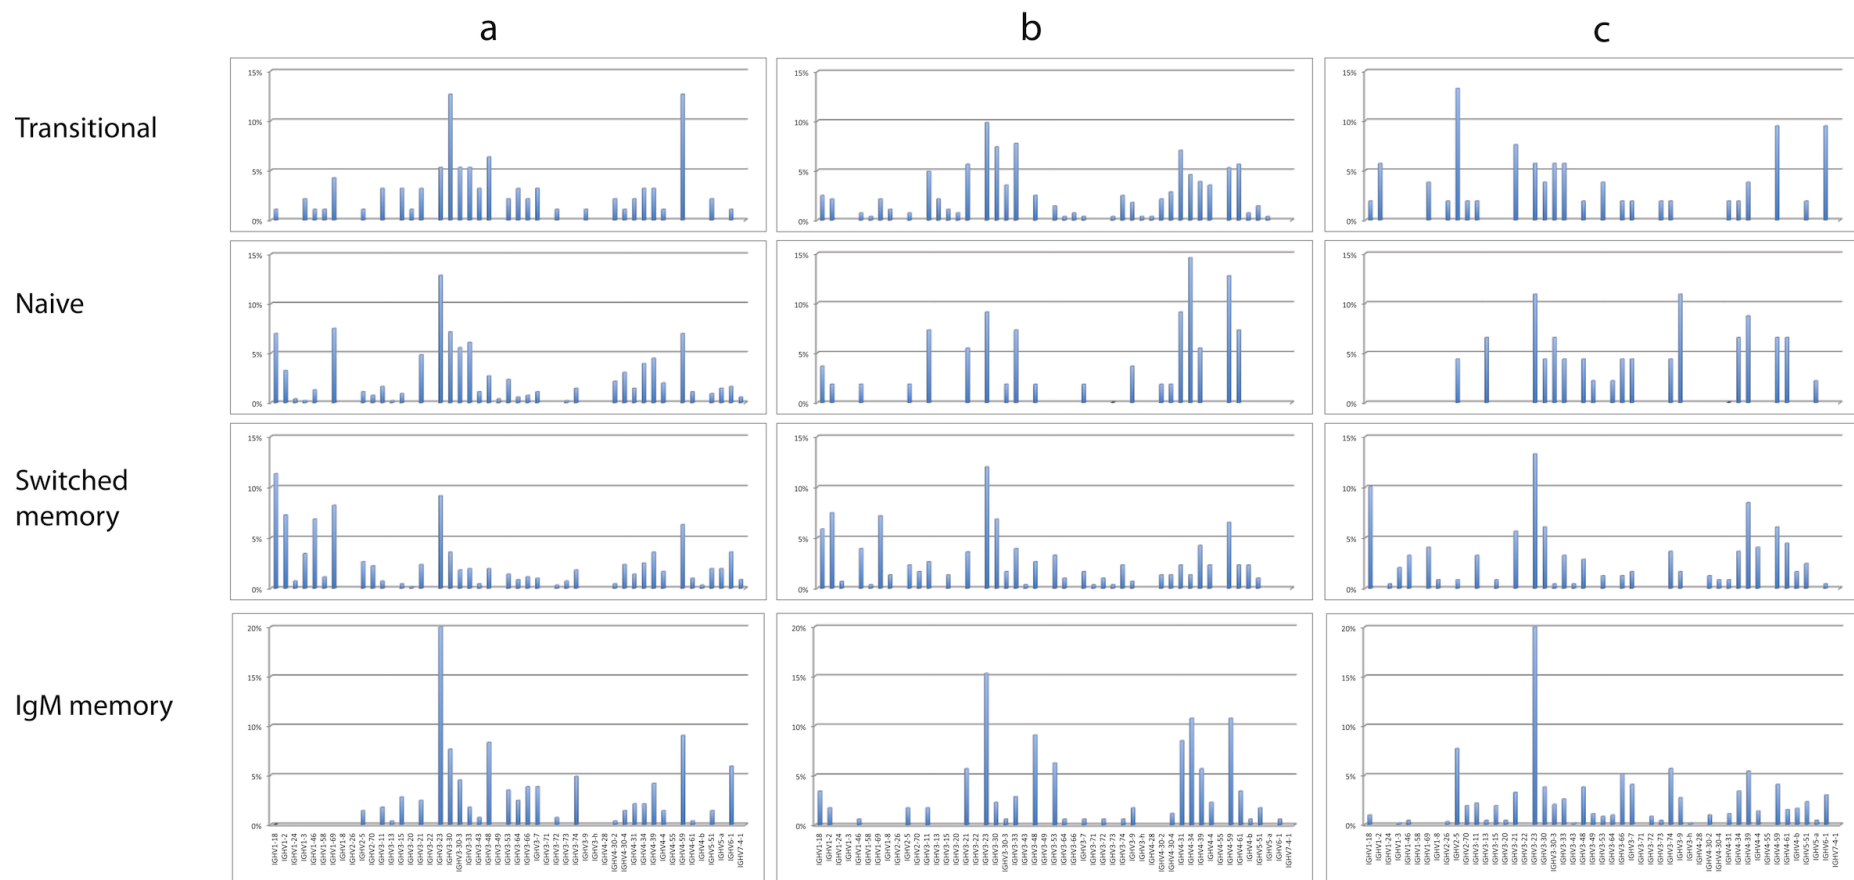

Figure S4. **Individual IGHV gene usage in B cell populations from individual donors.** The usage frequency of individual IGHV genes in transitional (IgD+CD27-CD10+, n= 433), naïve (IgD+CD27-CD10-, n=662), class-switched memory (IgD- and either IgG+ or IgA+, n=1293) and IgM memory (IgD+CD27+, n=1209) populations. Where clonal expansions of IGHV genes occurred, only one example of each clone family was counted. Allelic variations of each IGHV gene are not shown. Results of Chi-square comparisons are given in Table S3.

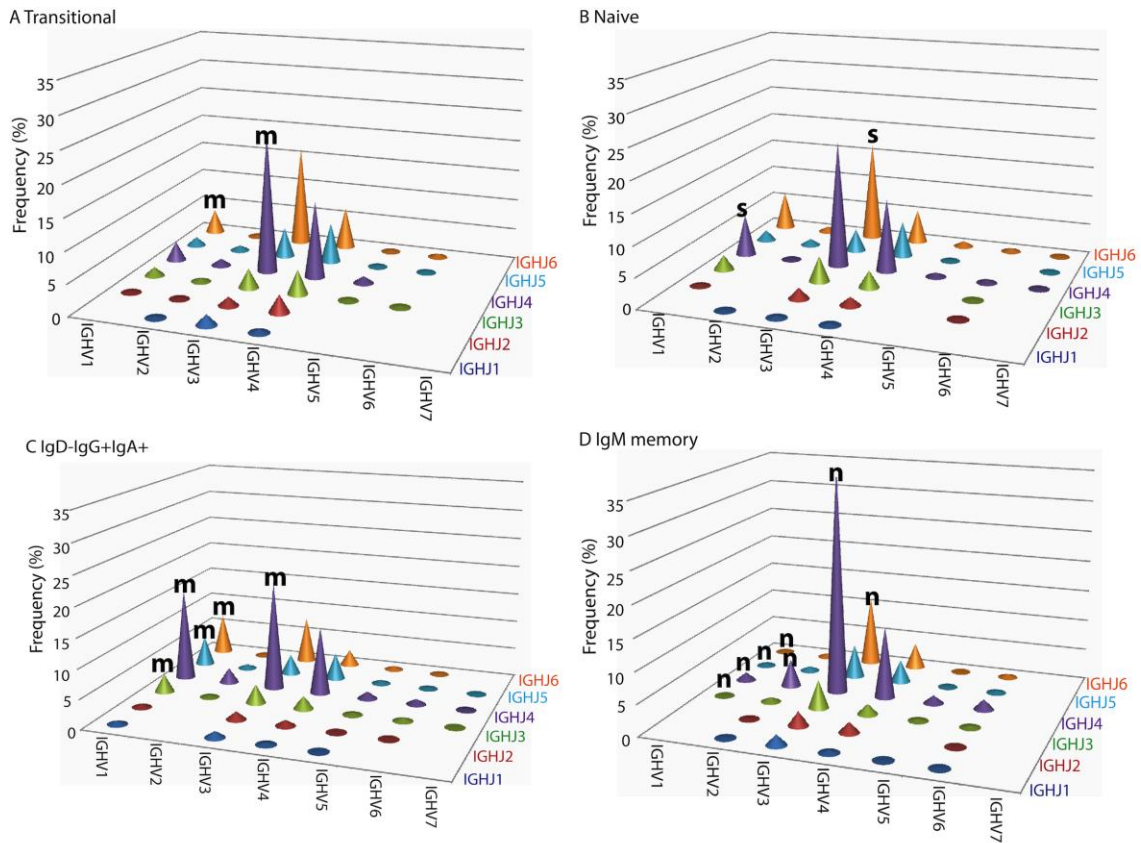

**Figure S5. IGHV gene family frequency in combination with IGHJ gene usage.** Individual genes were grouped into their IGHV gene families and separated by their IGHJ use. Frequency of usage for A) Transitional (IgD+CD27-CD10+, n= 433), B) Naïve (IgD+CD27-CD10-, n=662), C) Switched memory (IgD- and either IgG+ or IgA+, n=1293) and D) IgM memory (IgD+CD27+, n=1209) populations is given and groups marked with “m,” “s,” “n” show highly significant differences from IgM memory, Class-switched memory and Naïve cell populations respectively ( $p < 0.0001$ ).
